# Supplementary material for: Second Messenger Signaling in Bacillus subtilis: Accumulation of Cyclic di-AMP Inhibits Biofilm Formation
Source: Front Microbiol. 2016 May 25;7:804. doi: 10.3389/fmicb.2016.00804 (PMC4879592; doi:10.3389/fmicb.2016.00804)
Supplement: Supplementary file 1 [file Data_Sheet_1.XLSX]

## Sheet: down in 2040
BSU	Gene name	Regulator	Description	Fold mRNA reduction upon c-di-AMP accumulation	BH P-Value
BSU36070	cotG	GerE : GerR : SigK	spore coat protein	0.00130493	0.00125018	Mother cell
BSU06890	cotJAJBJC-yesJ	SigE : SpoIIID	polypeptide composition of the spore coat	0.00177171	0.00164245	Mother cell
BSU37920	gerQ	SigE	spore coat protein, necessary for the proper localization of CwlJ	0.00202796	0.00235068	Mother cell
BSU11810	spoVIF	GerR : SigK	required for spore coat assembly and resistance	0.00335006	0.00154625	Mother cell
BSU19780	cgeAB	GerE : GerR : SigK	spore coat protein, maturation of the outermost layer of the spore	0.00349515	0.00193784	Mother cell
BSU36430	usd-spoIIID	SigE	putative spoIIID leader peptide	0.00361862	0.00154625	Mother cell
BSU28110	spoVID	SigE	spore coat morphogenetic protein, promotes encasement of the spore	0.00569551	0.00178709	Mother cell
BSU11780	cotVWX	GerE : SigK	spore coat protein (insoluble fraction)	0.00737574	0.00223464	Mother cell
BSU28100	ysxE	SigE	inner spore coat protein	0.00743968	0.00196236	Mother cell
BSU32650	yurS	GerE : SigK	sporulation protein	0.00783207	0.00222316	Mother cell
BSU08970	prkA	SigE	putative serine protein kinase	0.00885122	0.00186943	Mother cell
BSU32640	sspG	GerE : SigK	small acid-soluble spore protein (minor)	0.00970754	0.00318317	Mother cell
BSU11750	cotY	GerE : GerR : SigK	spore coat protein (insoluble fraction)	0.0106393	0.0018705	Mother cell
BSU17030	cotE	GerE : SigE : SigK	outer spore coat morphogenetic protein	0.0107041	0.00207615	Mother cell
BSU25330	pgpH (deleted)		c-di-AMP specific phosphodiesterase	0.0108894	0.000802808
BSU38080	ywcI	Spo0A	unknown	0.010896	0.00125644
BSU11740	cotZ	GerE : SigK	spore coat protein (insoluble fraction)	0.012253	0.00229993	Mother cell
BSU39590	yxeD	AbrB : SigE : SigG	unknown	0.0125286	0.00477805	Mother cell
BSU27440	glnQHMP	SigE : TnrA	glutamine ABC transporter (binding protein)	0.0158762	0.00271278	Mother cell
BSU19740	yodTSRQP-kamA-yokU	SigE	similar to adenosylmethionine-8-amino-7-oxononanoate aminotransferase	0.0175161	0.00297966	Mother cell
BSU22800	spoIVA	SigE : SpoIIID	ATPase, spore coat morphogenetic protein, anchors the spore coat to the spore surface via SpoVM	0.0178036	0.00206754	Mother cell
BSU09958	sscA	GerE : SigK	small sporulation protein	0.0179215	0.00309518	Mother cell
BSU12090	cotT	SigK	spore coat protein (inner)	0.0210757	0.00412783	Mother cell
BSU10790	asnO	SigE	asparagine synthase (glutamine-hydrolysing)	0.0223365	0.00431596	Mother cell
BSU16720	ymxH	SigE	sporulation protein	0.0227851	0.00238734	Mother cell
BSU14250	yknT	SigE : SpoIIID	spore coat protein	0.0232255	0.00279568	Mother cell
BSU09230	yhcV	SigG : SpoVT	forespore-specific sporulation protein	0.0252603	0.00802034
BSU09830	yhaX	SigE : SpoIIID	SigE-dependent spore coat protein	0.0272146	0.00207615	Mother cell
BSU17320	ymaF	SigE	unknown	0.0276159	0.00206754	Mother cell
BSU09165	yhcO	SigE : SigK	unknown	0.0284769	0.00199141	Mother cell
BSU19110	yobW	SigE : SigK	sporulation membrane protein	0.0289144	0.00236599	Mother cell
BSU09750	sspB	SigG : SpoVT	small acid-soluble spore protein (major beta-type SASP)	0.0294593	0.00534413
BSU31730	yuzC	SigE	spore coat protein	0.0300876	0.00576848	Mother cell
BSU24640	tapA-sipW-tasA	AbrB : SinR	TasA anchoring/assembly protein	0.0312056	0.000240281	Biofilm
BSU09770	yheCD	SigE : SpoIIID	spore coat protein	0.0312413	0.00365384	Mother cell
BSU17990	sspOP	SigG	small acid-soluble spore protein (minor)	0.0314343	0.00576848
BSU34370	epsA-O	AbrB : SinR	extracellular polysaccharide synthesis, putative transmembrane modulator of EpsB activity, might activate EpsB autophosphorylation and substrate phosphorylation	0.0318403	0.000394234	Biofilm
BSU11730	cotO	SigE	spore coat morphogenetic protein, controls assembly of the coat layers and coat surface topography	0.0320922	0.00336056	Mother cell
BSU19770	cgeCD	GerE : SigK	maturation of the outermost layer of the spore	0.0330845	0.00305902	Mother cell
BSU40660	yybF		similar to antibiotic resistance protein	0.0340071	0.00431596
BSU40510	gdpP (deleted)		c-di-AMP phosphodiesterase, involved in stress signaling and response	0.0354823	0.000394234
BSU25600	comER	SigE	non-essential gene for competence	0.035627	0.00326827	Mother cell
BSU19330	sodF	SigE	superoxide dismutase	0.0358413	0.0040806	Mother cell
BSU23440	spoVAA-AB-AC-AD-AEB-AEA	SigG : SpoVT	essential for the uptake of the 1:1 chelate of pyridine-2,6-dicarboxylic acid (DPA(2,6)) and Ca(2+) into developing spores, required for spore maturation	0.0361209	0.00513646
BSU16730	spoVFA-VFB	SigK	dipicolinate synthase (subunit A)	0.036601	0.0051795	Mother cell
BSU25120	yqfT	SigE : SpoIIID	unknown	0.0368613	0.00368347	Mother cell
BSU40530	cotF	SigK	spore coat protein	0.0370966	0.0140215	Mother cell
BSU19280	yocN	SigE	similar to permease	0.0380161	0.00341656	Mother cell
BSU19270	yozN	SigE	unknown	0.0383003	0.00302225	Mother cell
BSU30840	yteA	SigG : SpoVT	sporulation protein	0.0391602	0.00538748
BSU07270	yfnHGFED	SigK	similar to glucose-1-phosphate cytidylyltransferase	0.0411261	0.00249069	Mother cell
BSU10400	yhxC	SigE	similar to alcohol dehydrogenase	0.0412751	0.00289154	Mother cell
BSU37910	spsABCDEFGIJKL	SigK	nucleotide-sugar-dependent glycosyltransferase, spore coat polysaccharide synthesis	0.0418247	0.00413355	Mother cell
BSU03920	glcU	SigG : SpoVT	probable glucose uptake protein	0.0420672	0.00464928
BSU18260	yngJIHHBGFE	SigE	3-methylbutanoyl-CoA dehydrogenase	0.0425148	0.00222481	Mother cell
BSU12050	yjdH	SigE	unknown	0.0425847	0.00451191	Mother cell
BSU13509	ykzP	SigG : SpoVT	unknown	0.0432285	0.0161151
BSU30920	cotI	SigK	spore coat protein	0.0442094	0.00207615	Mother cell
BSU24230	spoIVB	SigF : SigG	serine protease, cleaves SpoIVFA, this results in pro-SigK processing/activation in the mother-cell, does also cleave CtpB	0.0442333	0.00577195
BSU25080	yqfX	SigG	unknown	0.0460726	0.00689653
BSU00160	yaaH	SigB : SigE : SpoIIID	general stress protein, survival of ethanol stress, SafA-dependent spore coat protein	0.0463302	0.00279405	Mother cell
BSU39580	yxeE	GerE : SigK	spore coat protein	0.0466377	0.00570297	Mother cell
BSU30980	glgBCDAP	SigE	1,4-alpha-glucan branching enzyme	0.0485655	0.00305981	Mother cell
BSU14810	ylaKM	SigE : SpoIIID	similar to phosphate starvation inducible protein PhoH	0.0503834	0.00353489	Mother cell
BSU28380	gerM	SigE	germination (cortex hydrolysis) and sporulation	0.0513949	0.00249069	Mother cell
BSU02080	ybxH	SigG : SpoVT	unknown	0.0525406	0.00496588
BSU32280	yutG	GerE : SigK : SigE : SigF	similar to low temperature requirement C protein	0.0534077	0.0043917	Mother cell
BSU02600	cwlJ	SigE	spore coat protein, cell wall hydrolase	0.0535746	0.00680546	Mother cell
BSU09400	spoVR	SigE	involved in spore cortex synthesis	0.0541876	0.00310587	Mother cell
BSU17310	ymaG	SigK	spore coat protein	0.0541999	0.00259051	Mother cell
BSU22930	sleB	SigG : SpoVT	spore cortex-lytic enzyme	0.0566193	0.00426791
BSU08920	yhbB	SigE	unknown	0.0572623	0.00360854	Mother cell
BSU24170	mmgABCDE	CcpA : SigE	degradative acetoacetyl-CoA thiolase	0.0574156	0.00415778	Mother cell
BSU16880	ymfJ		unknown	0.0577102	0.00534413
BSU05710	ydhD	SigE	probable peptidoglycan hydrolase	0.0578159	0.00383979	Mother cell
BSU25710	cwlH	GerE : SigK	N-acetylmuramoyl-L-alanine amidase	0.059254	0.0045922	Mother cell
BSU27470	yrrD	SigG : SpoVT	forespore-specific sporulation protein	0.0593024	0.011512
BSU34470	yveA	SigG : SpoVT : DegU : SacY	aspartate/ glutamate transporter	0.0612993	0.00469515
BSU17720	yndA	SigE	unknown	0.0624505	0.0034667	Mother cell
BSU34380	slrR	Abh : AbrB : SinR	transcriptional activator of competence development and sporulation genes, represses SigD-dependent flagellar genes, antagonist of SlrA	0.0630875	0.000412191	Biofilm
BSU17700	cotC	GerE : SigK : SpoIIID	spore coat protein (outer)	0.0639761	0.00291837	Mother cell
BSU26950	yraGF-adhB-yraED	SigG	forespore-specific sporulation protein,similar to spore coat protein	0.0644013	0.00594691
BSU23350	ypzD	SigK : GerE	unknown	0.0660967	0.00479217	Mother cell
BSU27469	yrzRQ	SigG	unknown	0.0678865	0.0102457
BSU32860	yusN	SigG	unknown	0.0687071	0.0045922
BSU32859	yuzM	SigF : SigG : SpoVT	unknown	0.0687604	0.00518985
BSU19320	sqhC	SigE	squalene-hopene cyclase, biosynthesis of sporulenes, protection of the spore against oxidative stress [http://www.ncbi.nlm.nih.gov/sites/entrez/18436644 PubMed]	0.0689331	0.0052334	Mother cell
BSU29570	sspA	SigG : SpoVT	small acid-soluble spore protein (major alpha-type SASP)	0.0700345	0.0107526
BSU03930	gdh	SigG : SpoVT	glucose 1-dehydrogenase (NAD)	0.0700805	0.00499112
BSU30595	ytlA	SigK	similar to ABC transporter (binding protein)	0.0714682	0.0271826	Mother cell
BSU29500	ytfJ	SigF	germination protein, essential for germination in response to L-alanine	0.0728235	0.00451191
BSU11790	yjcA	SigE	unknown	0.0738537	0.00465167	Mother cell
BSU11549	yizD	SigE	unknown	0.0742373	0.00765948	Mother cell
BSU22290	sspM	SigG	small acid-soluble spore protein (minor SASP)	0.0745486	0.00737326
BSU09180	yhcQ	SigG	unknown	0.075377	0.00839105
BSU10720	gerPA-PB-PC-PD-PE-PF	SigK	probable spore germination protein	0.0759624	0.0104696	Mother cell
BSU24430	yqhV-spoIIIAA-AB-AC-AD-AE-AF-AG-AH	SigE : SpoIIID	AAA protease, required for SigG activation	0.076096	0.0018475	Mother cell
BSU17420	spoVK	SigE : SigK	required for spore maturation	0.0765148	0.00469515	Mother cell
BSU01570	pdaB	SigE	polysaccharide deacetylase	0.0784532	0.00309537	Mother cell
BSU03110	ycgH	SigG : SpoVT	similar to amino acid transporter	0.0790447	0.00839536
BSU15090	gerR	SigE : SpoIIID	probably DNA-binding protein, regulates transcription of some spore coat genes	0.0790837	0.00452381	Mother cell
BSU36030	ywrK	SigK : GerE	similar to arsenical pump membrane protein	0.0805523	0.0027657	Mother cell
BSU08980	yhbH	SigE	SigE-dependent sporulation gene	0.0805538	0.00382818	Mother cell
BSU31319	yuzI		unknown	0.0815751	0.00666147
BSU05890	ydhU	SigF : SpoVT : Fur	similar to Mn catalase, inactive pseudogene in strain 168	0.0817656	0.00576848
BSU34510	yvdQ	SigG	unknown	0.0840727	0.00513199
BSU28320	ysnD	SigE : SigK	inner spore coat protein	0.0864068	0.0176789	Mother cell
BSU30610	ytlC	SigK	similar to anion transport ABC transporter (ATP-binding protein)	0.0904114	0.0402289	Mother cell
BSU36550	spoIIQ	SigF	component of the SpoIIIA-SpoIIQ type III secretion system residing in the forespore membrane, required for anchoring of proteins on both sides of the sporulation septum	0.091264	0.00430616
BSU19639	yoyE	SigG : SpoVT	unknown	0.0935861	0.00577912
BSU10910	yisAZ	SigK	sulfate reduction and activation	0.0936583	0.0306933	Mother cell
BSU15310	spoIIGA-sigEG	SinR : Spo0A	Pro-SigE protease	0.0960133	0.00306033
BSU38070	sacT	Spo0A	transcriptional antiterminator for the sacP-sacA operon	0.0960262	0.00280564
BSU29510	ytfI	SigF	sporulation protein	0.0980617	0.00438895
BSU29910	ytzH	SigG : SpoVT	unknown	0.100175	0.00825875
BSU25760	spoIVCB-spoIIIC	GerE : SigE : SigK : SpoIIID	sporulation-specific sigma factor (SigK) (N-terminal half), other part: spoIIIC	0.101211	0.00706012	Mother cell
BSU10610	yhjR	GerE : SigE : SigK	inner spore coat protein	0.104233	0.0172245	Mother cell
BSU33340	sspJ	SigG	small acid-soluble spore protein (minor)	0.10586	0.00875548
BSU30910	cotSA	SigK	spore coat protein	0.108865	0.00384253	Mother cell
BSU17640	yncD	SigE	alanine racemase	0.109493	0.0045922	Mother cell
BSU17260	aprX	LexA	intracellular alkaline serine protease	0.114541	0.0052377
BSU14569	ykzV		unknown	0.115209	0.00360108
BSU10960	yitE		unknown	0.115703	0.00493398
BSU06559	yezF		unknown	0.116277	0.00657234
BSU23480	dacF-spoIIAA-AB-sigF	AbrB : SigF : SigG	penicillin-binding protein I, D-alanyl-D-alanine carboxypeptidase	0.118261	0.0055478
BSU30739	ytzL		unknown	0.119945	0.00842969
BSU28210	lonB	SigF	Lon-like ATP-dependent protease	0.121172	0.00464528
BSU01550	gerD	SigF : SigG	required for fast repsonse to the presence of germinants	0.121621	0.00935896
BSU15650	yloB		similar to MgtA magnesium transporter	0.121638	0.0045922
BSU14629	Sr1	CcpN	small regulatory RNA controlling AhrC expression, regulatory peptide	0.121882	0.00440091
BSU13470	sspD	SigG	small acid-soluble spore protein (minor alpha/beta-type SASP)	0.123711	0.0096479
BSU30710	ythA		cytochrome bd2, menaquinol oxidase (7:1 protons)	0.125522	0.00525878
BSU26740	cypA		cytochrome P450-like enzyme	0.125617	0.00513537
BSU15440	ylyA	SigG : SpoVT	modulator of SigG-containing RNA polymerase	0.126956	0.01131
BSU13830	ykvU	SigE	spore cortex membrane protein, required for germination at high pressure	0.127166	0.00451191	Mother cell
BSU18720	yoaR	SigG	unknown	0.128366	0.00689653
BSU12320	yjmC	CcpA : ExuR : SigE	unknown, may be involved in galacturonate utilization	0.12915	0.00631418	Mother cell
BSU19660	yozD		unknown	0.129219	0.00534413
BSU30860	ytcA		similar to to NDP-sugar dehydrogenase	0.12995	0.0107352
BSU18020	sspN-tlp	SigF : SigG	small acid-soluble spore protein (minor)	0.132304	0.01565
BSU25150	yqfQ	SigK	late sporulation protein	0.133078	0.00672395
BSU19490	gerT	SigK	spore coat protein, involved in germination	0.134843	0.0324031	Mother cell
BSU37190	ywjED		minor cardiolipin synthetase	0.135348	0.0128948
BSU08490	yfhED	SigB	general stress protein, survival of ethanol stress and low temperatures	0.13702	0.0111534
BSU03789	yczN		putative toxin	0.137215	0.00703956
BSU18670	oxdD	SigK	oxalate decarboxylase, spore coat protein	0.14044	0.048599	Mother cell
BSU08640	yfhS		unknown	0.143969	0.0123108
BSU26748	yrdD		part of the yrdD pseudogene	0.14399	0.00534413
BSU38990	scoAB	CcpA : SigE	succinyl CoA:3-oxoacid CoA-transferase (subunit A)	0.144302	0.00522606
BSU08550	sspK	SigG	small acid-soluble spore protein (minor) SASP	0.145104	0.0169311
BSU23190	dacB-spmA-spmB	SigE	penicillin-binding protein 5, D-alanyl-D-alanine carboxypeptidase	0.145888	0.00442699	Mother cell
BSU40950	yyaC	SigF	unknown	0.14687	0.00525878
BSU32850	fadM	FadR : SdpR	fatty acid degradation, similar to proline dehydrogenase	0.148964	0.0139562
BSU19510	yojB		unknown	0.149794	0.00539528
BSU03788	yczM		putative toxin	0.150151	0.00472345
BSU08660	sspE	SigG : SpoVT : YfhP	small acid-soluble spore protein (major gamma-type SASP)	0.150948	0.0173284
BSU03680	yclG		unknown	0.153037	0.010137
BSU19950	sspC	SigG : SpoVT	small acid-soluble spore protein (minor alpha/beta-type SASP)	0.153259	0.013229
BSU30870	ytcB		putative UDP-glucose epimerase	0.153676	0.0144957
BSU32720	yurZ		unknown	0.154102	0.00895462
BSU00430	yabG	SigK	protease	0.154259	0.0169704
BSU32320	yutC		unknown	0.158424	0.0184927
BSU03200	putBC	CodY : PutR : Spo0A	proline oxidase (L-proline, NAD)	0.159286	0.0058725
BSU30880	ytcC	SigK	sporulation protein, similar to lipopolysaccharide N-acetylglucosaminyltransferase	0.162997	0.020225	Mother cell
BSU09150	yhcN	SigF : SigG	forespore-specific gene	0.163608	0.019329
BSU34530	cotR	SigK	spore protein	0.164052	0.00559203	Mother cell
BSU28660	sspI	SigG	small acid-soluble spore protein (minor), SASP	0.165448	0.00966319
BSU35240	ctpB	SigE : SigG	carboxy-terminal processing serine protease, cleaves SpoIVFA, this results in processing of pro-SigK	0.165711	0.00790007	Mother cell
BSU17830	yndM		unknown	0.166828	0.0149369
BSU15810	spoVM	SigE	required for normal spore cortex and coat synthesis, inhibits the proteolytic activity of FtsH	0.167103	0.00555287	Mother cell
BSU01530	cwlD	LexA : SigE : SigG	N-acetylmuramoyl-L-alanine amidase, spore cortex peptidoglycan synthesis	0.170076	0.00749345	Mother cell
BSU22920	ypeB	SigG	unknown	0.171688	0.0117923
BSU15170	spoVD	SigE : SpoIIID	mother-cell specific penicillin-binding protein (spore cortex)	0.174451	0.00892373	Mother cell
BSU02070	csgA	SigG : SpoVT	required for the ability of the germinating spore to resume vegetative growth	0.174656	0.0199918
BSU37450	ywhK		unknown	0.179386	0.0089728
BSU25530	spoIIP	SigE : SigF	required for dissolution of the septal cell wall	0.183927	0.00490634	Mother cell
BSU11799	yjzK		unknown	0.186812	0.0418727
BSU35800	gerBA	SigG	nutrient receptor, germination response to the combination of glucose, fructose, and KCl	0.188069	0.0075942
BSU07660	yflJ		unknown	0.188484	0.010893
BSU29020	gapB	CcpN	glyceraldehyde-3-phosphate dehydrogenase, NADP-dependent, gluconeogenic enzyme	0.190136	0.0039848
BSU12110	yjfA	SigE	unknown	0.190248	0.0120687	Mother cell
BSU25540	gpr	SigF : SigG	spore protease (degradation of SASPs)	0.190733	0.00697302
BSU37510	pbpG	SigF : SigG	penicillin-binding protein 2d	0.191776	0.00821819
BSU30900	cotS	SigK	spore coat protein	0.192388	0.0045922	Mother cell
BSU37440	ywhL		unknown	0.192648	0.00757895
BSU10280	yhfM	SigF	unknown	0.192743	0.00895462
BSU19810	yodU		N-terminal part of the split gene spsM (together with ypqP), spore envelope polysaccharide biosynthesis, in B. subtilis 168 the gene is disrupted by the SP-beta prophage	0.193149	0.00626355
BSU03400	yckD	SigF : SigG	unknown	0.193165	0.0111534
BSU38240	ywcA	SigE	similar to Na+-dependent acetate symporter	0.193506	0.00986449
BSU18600	yozQ	SigG	unknown	0.193566	0.0104144
BSU36060	cotHB	GerE : SigK	spore coat protein (inner)	0.194191	0.0332321	Mother cell
BSU32849	yuzL		unknown	0.194534	0.00839105
BSU25520	yqxA	SigE	sporulation protein	0.194832	0.00384253	Mother cell
BSU30640	ytkC		similar to autolytic amidase	0.194959	0.0159437
BSU25360	yqfCD	SigE	sporulation protein	0.195047	0.00738645	Mother cell
BSU33050	gerAA-AB-AC	SigF : SigG : SpoVT	nutrient receptor, germination response to L-alanine	0.195198	0.00622377
BSU30560	pckA	CcpN	phosphoenolpyruvate carboxykinase	0.197428	0.00206685
BSU16790	tepA	SigG	orphan ClpP-like germination protease, contributes to SASP degradation	0.200233	0.00960405
BSU39060	citH		sporulation-specific secondary transporter of divalent metal ions/citrate complexes	0.202399	0.00917051
BSU13060	ykjA		unknown	0.204022	0.0117058
BSU13360	ykoP		unknown	0.204657	0.0210021
BSU11070	yitPOM		unknown	0.205542	0.000802808
BSU14320	yknUV		similar to ABC transporter (ATP-binding protein)	0.206116	0.00754124
BSU36750	spoIID	SigE : SpoIIID	required for complete dissolution of the asymmetric septum	0.207118	0.00548741
BSU15300	bpr	DegU	bacillopeptidase F	0.208744	0.00262904
BSU05520	ydgBA-cotP-ydfR-ydzRH		unknown	0.210304	0.0116631
BSU16799	ylzJ	SigG	germination protein, required for TepA activity	0.212456	0.00983234
BSU11290	yjaV	SigE	SigE-dependent sporulation gene, similar to UDP-glucose 4-epimerase	0.212924	0.00502344	Mother cell
BSU13380	ykoS		unknown	0.21522	0.00985041
BSU29160	ytvI	SigE	sporulation protein	0.217829	0.0204383	Mother cell
BSU10980	yitGF	SigG	similar to multidrug resistance protein	0.219733	0.00978431
BSU04630	ydcC	SigE	unknown	0.221565	0.00592324	Mother cell
BSU27830	coxA	SigE	spore cortex protein	0.22434	0.0174201	Mother cell
BSU15030	ylbJ	SigE	unknown	0.225486	0.00666793	Mother cell
BSU22869	ypzI		unknown	0.226404	0.0224513
BSU00640	spoIIE	Spo0A	protein serine phosphatase, septum-associated PP2C, dephosphorylation of SpoIIAA	0.227897	0.00392007
BSU12330	yjmD	CcpA : ExuR : SigE	galactitol-1-phosphate dehydrogenase	0.229826	0.0148511	Mother cell
BSU10390	yhfW	SigF	similar to Rieske [2Fe-2S] iron-sulfur protein	0.231001	0.00705993
BSU18820	yobB	AbrB	unknown	0.231314	0.00193784
BSU17410	cwlC	SigK	N-acetylmuramoyl-L-alanine amidase	0.232759	0.0123108	Mother cell
BSU14800	ylaJ	SigG	unknown	0.234049	0.0150785
BSU07840	yfkN	CcpA : PhoP	extracellular 2',3' cyclic nucleotide phosphodiesterase, 2' (or 3') nucleotidase and 5' nucleotidase	0.234939	0.00203979
BSU02220	ybfI		similar to transcription regulator (AraC family)	0.241835	0.00576916
BSU24510	yqhO		unknown	0.247765	0.0128602
BSU27980	spoIVFA-VFB	SigE	inhibitor of SpoIVFB metalloprotease	0.253376	0.00664443	Mother cell
BSU19430	cdaS	SigG	sporulation-specific diadenylate cyclase, synthesis of c-di-AMP	0.254385	0.0145001
BSU09140	yhcM	SigB : SigF : SigG	general stress protein	0.254531	0.0215543
BSU10009	yhzF		unknown	0.256018	0.00654865
BSU24580	yqhH	SigF	similar to SNF2 helicase	0.256786	0.00859679
BSU31590	yufS		unknown	0.257392	0.0080712
BSU07790	yfkQRS	SigG	part of the YfkQ-YfkR-YfkT germinant receptor of unknown specificity	0.257844	0.0237679
BSU01520	ybaK	LexA : SigG	unknown	0.265194	0.0180223
BSU31380	yuzA	SigB : SigG	general stress protein	0.267286	0.0287566
BSU38750	cydB	CcpA : ResD : Rex	cytochrome bd ubiquinol oxidase (subunit II), high affinity terminal oxidase	0.267286	0.00875702
BSU32340	lytH	SigK	unknown	0.268414	0.0250638	Mother cell
BSU18710	yozF		unknown	0.270688	0.0148545
BSU27670	spoVB	SigE	involved in spore cortex synthesis	0.271296	0.0116324	Mother cell
BSU22250	yppG		spore coat protein	0.272699	0.0174185
BSU08800	ygaK		similar to reticuline oxidase	0.273863	0.00727189
BSU28060	spoIIB		spatial and temporal regulation of the dissolution of septal peptidoglycan during engulfment	0.273993	0.00452381
BSU11260	yjzC		unknown	0.274914	0.0267733
BSU22169	ypzG		unknown	0.274954	0.0195226
BSU05740	phoB	PhoP : SigE	alkaline phosphatase A	0.275053	0.0101141
BSU11510	yjbE		unknown	0.276683	0.00433235
BSU10780	yisN		unknown	0.277026	0.020661
BSU02210	ybfH		unknown	0.277365	0.00655931
BSU17900	sirA	Spo0A	sporulation protein, inhibits DNA replication	0.277546	0.00226464
BSU25750	nucB	SigE	sporulation-specific extracellular nuclease	0.278289	0.0147924	Mother cell
BSU13390	ykoT		similar to dolichol phosphate mannose synthase	0.278685	0.0176332
BSU08670	ygaB		unknown	0.279365	0.0039848
BSU18908	yozY		unknown	0.281223	0.0018475
BSU25010	yqgE		unknown	0.284088	0.0124157
BSU20190	yosA		unknown	0.285826	0.0163171
BSU13190	ispA		major intracellular serine protease	0.286356	0.00650591
BSU29630	refZ	CcpA : PhoP : Spo0A	regulator of FtsZ, facilitates switch from medial to polar FtsZ ring placement during sporulation	0.286675	0.00286098
BSU19259	yoyB		unknown	0.28734	0.022932
BSU11139	yizC		unknown	0.287754	0.0258481
BSU19600	yodHI	SigK	unknown	0.289458	0.0139144	Mother cell
BSU08110	sspH	CcpA : SigG	small acid-soluble spore protein (minor)	0.292184	0.0126963
BSU18780	yoaW	AbrB : SigE	unknown	0.294173	0.00287501	Mother cell
BSU31720	degQ	ComA : DegU	stimulates production of degradative enzymes and of extracellular poly-gamma-glutamate, stimulates phosphorylation of DegU by DegS	0.295024	0.00516668
BSU24650	yqzG	AbrB : SigF	unknown	0.296198	0.0168128
BSU08170	yfjABCDEF		unknown	0.297446	0.00136464
BSU30720	ythB		cytochrome bd2, menaquinol oxidase (7:1 protons)	0.299504	0.0219356
BSU31290	yugT	Spx	similar to exo-alpha-1,4-glucosidase	0.301251	0.0123719
BSU33540	azoR2	MhqR : SigG	similar to NAD(P)H dehydrogenase (quinone)	0.304909	0.000772446
BSU18450	gltA	FsrA : GltC : TnrA	large subunit of glutamate synthase	0.3074	0.0075942
BSU18470	proJ		glutamate 5-kinase	0.310571	0.00384253
BSU24480	yqhR		unknown	0.311974	0.0206855
BSU31080	bslA	AbrB : DegU	amphiphilic protein, forms water-repellent surface layer of the biofilm, inhibitor of KinA autophosphorylation, and subsequently of entry into sporulation	0.312518	0.00196236
BSU22050	bpsAB		type III polyketide synthase	0.313904	0.0104966
BSU18480	proH		pyrroline-5-carboxylate reductase	0.315841	0.00628977
BSU18200	nrnB		oligoribonuclease (nano-RNase)	0.315968	0.0176607
BSU03700	gerKAKC	SigG : SpoVT	nutrient receptor	0.316967	0.0180462
BSU08230	catDE	CatR : YodB	essential for viability in the presence of catechol	0.317729	0.00534413
BSU03190	ycgL		unknown	0.319493	0.0201929
BSU13040	hmp	NsrR : ResD	flavohemoglobin, involved in resistance to nitric oxide (NO)	0.3211	0.0109261
BSU32070	yuiC	CodY : SigF	stationary phase survival protein, sporulation protein	0.321947	0.00539528
BSU30890	ytxO	SigK	spore coat protein	0.325754	0.0112749	Mother cell
BSU19669	yoyF		unknown	0.32757	0.012908
BSU27570	yrzK		unknown	0.32766	0.0137383
BSU37620	rsfA	RsfA : SigF : SigG	probable regulator of transcription of SigF-dependent genes	0.330055	0.0161268
BSU07250	yetO		similar to cytochrome P450 / NADPH-cytochrome P450 reductase	0.331071	0.0190529
BSU18700	yoaQ		unknown	0.334908	0.0222663
BSU39000	yxjC	CcpA : SigE	sporulation protein, transporter for 3-hydroxybutyrate	0.336073	0.0200037
BSU12350	yjmF	CcpA : ExuR : SigE	similar to D-mannonate oxidoreductase/ fructuronate reductase	0.337409	0.017449	Mother cell
BSU23530	spoIIM	SigE	required for dissolution of the septal cell wall	0.339519	0.010031	Mother cell
BSU07130	lplD		α-galacturonidase	0.340198	0.0165683
BSU37030	racA	SigH : Spo0A	cell division protein: attaches the chromosome to the cell pole	0.34091	0.00558746
BSU13290	ykzD		unknown	0.341195	0.0288952
BSU31450	kinB	CodY : stringent response	two-component sensor kinase, phosphorylates Spo0F, part of the phosphorelay	0.350332	0.000333835
BSU39960	yxaI		membrane protein	0.351774	0.000925529
BSU32000	dhbACEBF	AbrB : Fur	2,3-dihydro-2,3-dihydroxybenzoate dehydrogenase	0.354939	0.00534977
BSU27690	yrzE		unknown	0.355679	0.0110135
BSU18440	gltB	FsrA : GltC : TnrA	small subunit of glutamate synthase	0.355851	0.011798
BSU00650	yabST		unknown	0.357778	0.00786781
BSU37750	ywfA		similar to chloramphenicol resistance	0.35778	0.0244428
BSU27680	yrbG		unknown	0.359767	0.0265951
BSU36210	ywqHIJKL		unknown	0.359789	0.00117439
BSU39980	qdoI	LmrA : QdoR	Fe-containing quercetin 2,3-dioxygenase	0.361406	0.00485246
BSU06280	ydjP	SigE : SigW	similar to chloroperoxydase	0.363583	0.0104373	Mother cell
BSU09360	yhdC		unknown	0.3648	0.0220803
BSU09940	yhaL	SigE	SigE-dependent sporulation gene	0.367741	0.00798656	Mother cell
BSU10600	yhjQ		unknown	0.36851	0.0227723
BSU40430	yycE		unknown	0.369673	0.047268
BSU07140	yetF		unknown	0.370674	0.0178393
BSU17670	cotU	GerE : GerR	spore coat protein	0.372956	0.00839105
BSU12340	uxuA	CcpA : ExuR : SigE	D-mannonate hydrolyase	0.373097	0.0225832	Mother cell
BSU32270	yutH	SigE : SpoIIID	spore coat protein	0.374936	0.011013	Mother cell
BSU21950	ypzA	SigG	unknown	0.376135	0.0160715
BSU32500	pucBCD	PucR	xanthine dehydrogenase	0.377124	0.0067149
BSU02240	mpr		extracellular metalloprotease	0.378688	0.0233002
BSU13710	ykvI	SigE	unknown	0.379394	0.01694	Mother cell
BSU22850	seaA	SigF	involved in spore envelope assembly	0.381404	0.0123737
BSU06290	yeaA	SigE : SigW	unknown	0.382448	0.00930113	Mother cell
BSU08820	katA	PerR	vegetative catalase 1	0.385804	0.00546718
BSU14160	ykuO	Fur	unknown	0.385836	0.00868624
BSU29239	ytrHI	SigE	sporulation protein	0.386819	0.00522606	Mother cell
BSU38090	vpr	LexA : PhoP	minor extracellular serine protease	0.388382	0.00551467
BSU19020	yobN		similar to L-amino acid oxidase	0.391435	0.0266875
BSU27840	safA	SigE	morphogenetic protein associated with SpoVID	0.392915	0.0125684	Mother cell
BSU11410	yjbA	SigF	unknown	0.393016	0.0146438
BSU00370	abrB	AbrB : Spo0A	transcriptional regulator of transition state genes	0.394121	0.000799433
BSU03120	ycgI		unknown	0.395226	0.0162599
BSU31959	ybdZ		unknown	0.396459	0.00917051
BSU02250	ybfJ		unknown	0.396619	0.0256895
BSU32480	pucD	PucR	purine utilization	0.404452	0.00704599

## Sheet: up in 2040
BSU	Gene name	Regulator	Description	Fold mRNA increase upon c-di-AMP accumulation	BH P-Value
BSU09710	bmrCD	AbrB : BmrB	multidrug ABC transporter (ATP-binding protein), also involved in the signalling pathway to activate KinA at the onset of sporulation	22.5963	0.000240281
BSU27190	yrzI	AbrB	unknown	19.6168	0.000394234
BSU21480	sunA	Abh : AbrB : Rok : YvrHb	sublancin 168 lantibiotic antimicrobial precursor peptide	11.3974	0.00154625
BSU25310	yqfG-dgkA (due to resistance cassette expression)		undecaprenol kinase	8.63693	0.00048986
BSU33222	sigO-rsoA	YvrHb : SigO-RsoA	co-sigma factor (with SigO)	8.47593	0.0113352
BSU21330	yomKJ		unknown	8.17249	0.0041813
BSU33239	yvrJ-oxdC-(yvrL)	SigO-RsoA	may be involved in response to acid stress	8.04778	0.00290597
BSU12120	yjfB	SigD	unknown	7.43362	0.00147186
BSU31230	tlpB	SigD	methyl-accepting chemotaxis protein	6.63094	0.00356665
BSU28890	yscB	AbrB : SigD	unknown	6.61674	0.00451191
BSU18610	yoaH	SigD	membrane-bound chemotaxis receptor, similar to methyl-accepting chemotaxis protein	6.58113	0.00446204
BSU35860	pgdS	SigD	gamma-DL-glutamyl hydrolase	6.18216	0.00193784
BSU13520	ykrP		unknown	6.11128	0.00222481
BSU11928	yjzFGOPQ		unknown	6.07774	0.00666032
BSU35150	yvzB		similar to flagellin	5.59744	0.00283632
BSU31260	mcpB	SigD	methyl-accepting chemotaxis protein	5.49529	0.00386155
BSU14470	mreBH	SigI	cell-shape determining protein	5.46959	0.00169105
BSU38800	yxkH		unknown	5.41578	0.00622377
BSU13950	mcpC	SigD	methyl-accepting chemotaxis protein	5.25715	0.00291731
BSU38400	epr	DegU : ScoC : SigD : SinR	minor extracellular serine protease, involved in control of swarming motility	5.13352	0.00372747
BSU21440	bdbB	Abh : AbrB : Rok : YvrHb	thiol-disulfide oxidoreductase	5.08392	0.00684992
BSU21460	bdbA	Abh : AbrB : Rok : YvrHb	thiol-disulfide oxidoreductase	5.07539	0.00811015
BSU19210	yocH	AbrB : Spo0A : WalR	peptidoglycan hydrolase (amidase)	5.03335	0.00103443
BSU21450	sunS	Abh : AbrB : Rok : YvrHb	sublancin S-glycosyltransferase	5.005	0.00622377
BSU18979	yoyA		unknown, putative pseudogene	5.0013	0.00259051
BSU21470	sunT	Abh : AbrB : Rok : YvrHb	sublancin 168 lantibiotic ABC transporter	4.9229	0.00411579
BSU20320	yorNOPQRS		unknown	4.91421	0.0339723
BSU12519	yjzJ		unknown PBSX prophage protein	4.8917	0.00782849
BSU13420	ykoW		diguanylate cyclase and potential phosphodiesterase	4.77822	0.00734718
BSU35360	hag	CodY : CsrA : ScoC : SigD	flagellin protein	4.7759	0.00381919
BSU15960	sivC	AbrB : SigD	inhibitor of entry into sporulation via KinB or KinC	4.72198	0.00460123
BSU07350	yfmTS	SigD	similar to benzaldehyde dehydrogenase	4.71683	0.00343943
BSU05610	vmlR	RNA switch	ABC transporter (ATP-binding protein), efflux of antibiotics (virginiamycin M, lincomycin)	4.68039	0.000521866
BSU13680	motAB	SigD	H+-coupled MotAB flagellar stator	4.62426	0.00431596
BSU31240	mcpA-tlpA	SigD	methyl-accepting chemotaxis protein	4.62275	0.00998444
BSU35780	lytD	SigD	glucosaminidase	4.59733	0.00235068
BSU33690	yvaQ		membrane-bound chemotaxis receptor, similar to methyl-accepting chemotaxis protein	4.47049	0.00262904
BSU02050	ybdO	AbrB : SigD	unknown	4.44876	0.00554022
BSU03440	tlpC	SigD	methyl-accepting chemotaxis protein	4.39835	0.00822196
BSU16299	ylzI		unknown	4.32047	0.00401746
BSU03981	mtlAFD	MtlR	trigger enzyme: mannitol-specific phosphotransferase system, EIICB of the PTS	4.29792	0.00203824
BSU21530	yolAB	AbrB	similar to phage-related protein	4.23108	0.00235068
BSU29380	tcyJKLMN-ribR	CymR : YtlI	cystine ABC transporter (binding protein)	4.21183	0.0125014
BSU21010	yonRS		unknown	4.20541	0.0043917
BSU29390	ytmI	CymR : YtlI	sulphur N-acetylase, required for the conversion of S-methyl-cysteine to cysteine	4.17498	0.0391139
BSU37350	sboAX	AbrB : ResD : Rok	subtilosin A	4.1702	0.00167324
BSU16180	fla-che	CodY : SigD : Spo0A	flagellar basal-body rod protein	4.13483	0.0023363
BSU35350	yvyC-fliDST	SigD	similar to flagellar protein	4.05143	0.00587265
BSU14010	cheV	SigD	modulation of CheA activity in response to attractants	3.96735	0.00491119
BSU38850	yxkC	SigD : TnrA	unknown	3.9468	0.0189094
BSU21940	degR	SigD	regulation of degradative enzyme production	3.86227	0.00193936
BSU04180	ydaC		unknown	3.82138	0.00576661
BSU11990	yjdB	AbrB : PhoP	unknown	3.75784	0.00164236
BSU09370	lytF	SigD : SlrR	gamma-D-glutamate-meso-diaminopimelate muropeptidase (major autolysin)	3.582	0.00584421
BSU13280	ykoJ		unknown	3.57393	0.00159078
BSU35319	smiA		swarming motility inhibitor A, adaptor protein for LonA-mediated degradation of SwrA	3.51732	0.00711818
BSU12560	xpf		PBSX phage RNA polymerase sigma factor	3.49711	0.0130102
BSU27070	levDEFG-sacC	CcpA : LevR : SigL	fructose-specific phosphotransferase system, EIIA component of the PTS	3.48445	0.00255037
BSU27180	yrhH	SigM : SigW : SigX	similar to methyltransferase	3.47978	0.00616725
BSU11910	yjcM	AbrB	unknown	3.45965	0.00686365
BSU04270	ydaJKLMN		general stress protein of unknown function	3.45585	0.00128
BSU26190	yqaRST		similar to phage-related terminase	3.36912	0.00232639
BSU07460	yfmI	AbrB : Spo0A	similar to macrolide-efflux transporter	3.2546	0.0023064
BSU35400	flgLKM	ComK : DegU : SigD	flagellar hook-associated protein 3 (HAP3)	3.24938	0.00154625
BSU16080	ylqH		similar to flagellar biosynthetic protein	3.22465	0.0121611
BSU23370	ypuA	SigM	unknown	3.1982	0.00236599
BSU03651	bsdD	BsdA	resistance to salicylic acid	3.18406	0.00305535
BSU38410	sacXY	SacY	trigger enzyme: sucrose-specific phosphotransferase system, EIIBC component of the PTS (low affinity)	3.1527	0.000643027
BSU02040	ybdN	AbrB	unknown	3.142	0.00167324
BSU14620	slp		small peptidoglycan-associated lipoprotein	3.13176	0.000265229
BSU35420	yvyG	ComK : DegU : SigD	flagellar filament assembly protein	3.08937	0.000885246
BSU32719	yuzK		unknown	3.06857	0.0019451
BSU12539	ykzK		unknown PBSX prophage protein	3.06123	0.00291552
BSU11570	cwlQ	SigD	cell wall hydrolase	3.05362	0.00501208
BSU12520	xkdBC-xtrA	Xre	PBSX prophage	3.03425	0.00451772
BSU27370	yrrL	Spo0A	similar to folate metabolism	3.01816	0.00382818
BSU04990	yddJ	AbrB	unknown	2.99219	0.00104029
BSU35390	yviE		unknown	2.99197	0.000802808
BSU02520	ycbJ	AbrB : YcbG	similar to macrolide 2'-phosphotransferase	2.96257	0.000487962
BSU16070	ylqG		unknown	2.95923	0.0073568
BSU37790	rocG	AbrB : AhrC : CcpA : RocR : SigL	trigger enzyme: catabolic glutamate dehydrogenase induced by arginine, ornithine or proline, subject to carbon catabolite repression	2.9164	0.0154431
BSU40579	yyzL		unknown, putative pseudogene	2.90563	0.0045922
BSU12880	ykcBC	YclJ : YrkP	unknown	2.89573	0.00585326
BSU20520	yoqT		unknown	2.8905	0.0299018
BSU16060	rnhB		RNase HII, endoribonuclease	2.88992	0.00485246
BSU20500	ligB		DNA ligase (ATP-dependent)	2.8776	0.00213957
BSU26150	yqbD		similar to phage-related protein	2.8616	0.00122331
BSU38380	ywbB		unknown	2.85537	0.00885549
BSU13100	ykkD		similar to molecular chaperone	2.8447	0.00412783
BSU35640	lytABC	SigD : SlrR : YvrHb	secretion of major autolysin LytC	2.8338	0.0090012
BSU03640	bsdCD	BsdA	phenolic acid decarboxylase	2.80255	0.00182813
BSU29600	braB		branched-chain amino acid transporter	2.78414	0.0103208
BSU38930	yxjJ	DegU : SigB	general stress protein, survival of ethanol and salt stresses	2.76885	0.000265513
BSU30370	bceAB	BceR	bacitracin ABC transporter (permease) for bacitracin export	2.76882	0.00167464
BSU02320	ybfOP	AbrB : SigW	similar to transcription regulator (AraC family)	2.76852	0.00199141
BSU20420	yorD	AbrB	unknown	2.76463	0.00832372
BSU36400	flhOP	SigD	flagellar basal-body rod protein, required for hook assembly	2.7641	0.00782849
BSU17290	ebrAB		multidrug efflux transporter	2.75755	0.0051795
BSU02300	ybfN		unknown	2.73991	0.00599522
BSU28900	ysbAB		antiholin-like protein	2.73005	0.000240281
BSU24750	yqhB	LexA : SigB	general stress protein, similar to hemolysin	2.72211	0.00118651
BSU17267	ymzE		part of the ymzE pseudogene	2.70308	0.00207615
BSU13970	ykwD		unknown	2.69735	0.00309779
BSU21620	yokE		unknown	2.69461	0.00453329
BSU12710	xkdR		PBSX prophage	2.68802	0.00138423
BSU10230	yhfH		unknown	2.68532	0.00412783
BSU05060	lrpB		transcriptional regulator involved in repression of glyA transcription and KinB-dependent sporulation	2.67965	0.00372747
BSU29720	motS		Na+-coupled MotP-MotS flagellar stator	2.66454	0.00819871
BSU22910	ypfA		c-di-GMP receptor protein, inhibits motility at high c-di-GMP concentrations	2.64207	0.00310817
BSU08029	yfzA		unknown	2.63098	0.00431103
BSU10380	hemAT	SigD	haem-based aerotactic transducer	2.62792	0.00358095
BSU34940	yvpB		unknown	2.62133	0.00324878
BSU02190	ybfF		unknown	2.59053	0.00715557
BSU14480	abh	SigM : SigX	transcriptional regulator of transition state genes	2.58688	0.00198849
BSU20560	yoqO		unknown	2.57211	0.00136846
BSU35890	capCAE	DegU	capsular polyglutamate biosynthesis	2.56928	0.00169105
BSU09680	nhaC		Na+/H+ antiporter	2.56561	0.0147919
BSU37780	rocA	AbrB : AhrC : CodY : RocR : SigL	3-hydroxy-1-pyrroline-5-carboxylate dehydrogenase	2.56018	0.00570647
BSU35380	fliW		checkpoint protein for hag expression, CsrA anatagonist	2.55672	0.00282443
BSU02440	glnK		two-component sensor kinase, regulation of the glsA-glnT operon	2.55209	0.00525878
BSU26090	yqbEFGHJ		similar to phage-related protein	2.55208	0.00279926
BSU08380	yfiS		similar to multidrug resistance protein	2.54079	0.00336056
BSU05080	yddR		unknown	2.53929	0.00702636
BSU38330	ywbG	YwbI	unknown	2.51988	0.0447831
BSU29310	ytnJ	CymR : YtlI	alkylmonooxygenase, required for the conversion of S-methyl-cysteine to cysteine	2.5151	0.010703
BSU36600	mta	Mta	transcriptional activator of multidrug-efflux transporter genes, activates ymfD expression	2.50613	0.00196236
BSU39880	yxbC	AbrB : CodY : SpoA	unknown	2.49793	0.00301851
BSU12740	xkdU		PBSX prophage	2.4966	0.00255847
BSU39500	yxeM	CymR	putative cysteine ABC transporter (binding protein), the yxeK-snaB-yxeM-yxeN-yxeO-sndB-yxeQ operon may be implicated in the utilization of a modified cysteine variant	2.45511	0.0251635
